# Supplementary material
Source: PubMed Central journal article supplement (PMC7959097)

## Supplemental Data

**S1:** Schematic of the 908 Devices ZipChip displaying the sample well (S), the background electrolyte well (B), the sample waste well (SW), the well in which the bulk flow pressure is provided to produce the spray (P), and the channels that connect the wells. Analyte separation occurs in the serpentine channel.

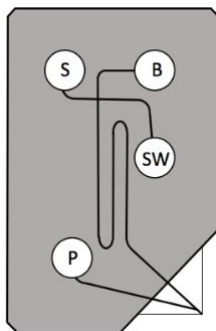

**S2:** Lobinaline, the primary alkaloid produced by *Lobelia Cardinalis*.

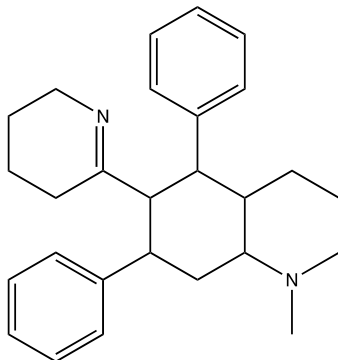

**S3:** Flow-chart displaying the processing steps of the mass spectral data using MZmine2.

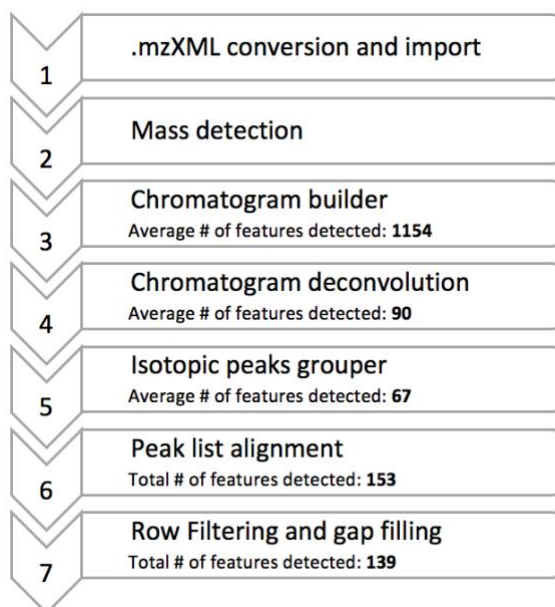

**S4:** Average area counts and %RSD for each of the selected ions of interest. Corresponding putative structures can be found in supplementary figure S4.

|                                                                                                                                                                                 | Feature(m/z)(charge)         | Putative Formula                                              | Avg Area Count WT | RSD | Avg Area Count DAT | RSD | Avg Area Count Mutant | RSD | NOTES           |
|---------------------------------------------------------------------------------------------------------------------------------------------------------------------------------|------------------------------|---------------------------------------------------------------|-------------------|-----|--------------------|-----|-----------------------|-----|-----------------|
| A1                                                                                                                                                                              | 373.2638(z=1), 387.1359(z=2) | C <sub>27</sub> H <sub>33</sub> N <sub>2</sub>                | 8.16E+07          | 9%  | 9.09E+07           | 17% | 1.79E+08              | 16% | lob. derivative |
| A2                                                                                                                                                                              | 387.2795(z=1), 394.1415(z=2) | C <sub>27</sub> H <sub>35</sub> N <sub>2</sub>                | 1.75E+09          | 7%  | 3.45E+09           | 11% | 5.23E+09              | 11% | Peak 1          |
| A3                                                                                                                                                                              | 399.2822(z=1), 400.1446(z=2) | C <sub>27</sub> H <sub>31</sub> N <sub>2</sub> O              | 7.28E+07          | 23% | 1.57E+08           | 24% | 1.60E+08              | 24% | Peak 2          |
| A4                                                                                                                                                                              | 401.2587(z=1), 401.1284(z=2) | C <sub>27</sub> H <sub>33</sub> N <sub>2</sub> O              | 9.42E+06          | 19% | 4.61E+07           | 21% | 6.53E+07              | 25% | lob. derivative |
| A5                                                                                                                                                                              | 403.2740(z=1), 402.1410(z=2) | C <sub>27</sub> H <sub>35</sub> N <sub>2</sub> O              | 8.38E+07          | 11% | 3.84E+08           | 19% | 5.31E+08              | 20% | Peak 3          |
| A6                                                                                                                                                                              | 415.2749(z=1), 408.1415(z=2) | C <sub>27</sub> H <sub>31</sub> N <sub>2</sub> O <sub>2</sub> | 1.42E+07          | 17% | 6.94E+07           | 23% | 3.09E+07              | 23% | lob. derivative |
| A7                                                                                                                                                                              | 417.2537(z=1), 409.1308(z=2) | C <sub>27</sub> H <sub>33</sub> N <sub>2</sub> O <sub>2</sub> | 6.61E+06          | 21% | 2.35E+06           | 33% | 3.91E+06              | 25% | lob. derivative |
| A8                                                                                                                                                                              | 419.2693(z=1), 410.1383(z=2) | C <sub>27</sub> H <sub>35</sub> N <sub>2</sub> O <sub>2</sub> | 7.50E+05          | 16% | 8.21E+06           | 20% | 1.23E+07              | 30% | lob. derivative |
| B1                                                                                                                                                                              | 130.1595(z=1)                | C <sub>8</sub> H <sub>20</sub> N                              | 1.43E+08          | 25% | 1.51E+08           | 23% | 1.72E+08              | 23% | Peak 4          |
| B2                                                                                                                                                                              | 200.2363(z=1)                | C <sub>13</sub> H <sub>30</sub> N                             | 1.78E+08          | 22% | 2.03E+08           | 24% | 2.19E+08              | 26% | Peak 5          |
| C1                                                                                                                                                                              | 228.1967(z=1)                | C <sub>13</sub> H <sub>26</sub> NO <sub>2</sub>               | 7.17E+07          | 25% | 1.77E+08           | 22% | 3.03E+08              | 22% | Peak 6          |
| C2                                                                                                                                                                              | 242.2115(z=1) isomer         | C <sub>14</sub> H <sub>28</sub> NO <sub>2</sub>               | 8.49E+07          | 29% | 1.69E+08           | 25% | 4.09E+08              | 25% | Peak 7          |
| C2                                                                                                                                                                              | 242.2115(z=1) isomer         | C <sub>14</sub> H <sub>28</sub> NO <sub>2</sub>               | 5.60E+07          | 24% | 1.00E+08           | 21% | 2.58E+08              | 25% | Peak 8          |
| C2                                                                                                                                                                              | 242.2115(z=1) isomer         | C <sub>14</sub> H <sub>28</sub> NO <sub>2</sub>               | 3.24E+08          | 20% | 5.22E+08           | 21% | 1.43E+09              | 21% | Peak 9          |
| C3                                                                                                                                                                              | 258.2437(z=1)                | C <sub>15</sub> H <sub>32</sub> NO <sub>2</sub>               | 1.03E+08          | 28% | 8.22E+08           | 23% | 1.28E+09              | 24% | Peak 10         |
| C4                                                                                                                                                                              | 272.2574(z=1)                | C <sub>16</sub> H <sub>34</sub> NO <sub>2</sub>               | 6.82E+07          | 25% | 3.82E+08           | 24% | 1.15E+09              | 25% | Peak 11         |
| Note: Peaks corresponding to A1, A4, and A6-A8 are not visible in the base peak electropherogram, however they are molecules of interest due to their lobinaline-like structure |                              |                                                               |                   |     |                    |     |                       |     |                 |

**S5:** Structures of interest. Group A represents lobinaline and lobinaline-like molecules. Group B consists of conjugated monoamines. Structures shown are putative as multiple varying chain lengths are possible for both molecules. Group C consists of lobeline-like molecules which are consistent with similar molecules found in other *Lobelia* species.<sup>16</sup>

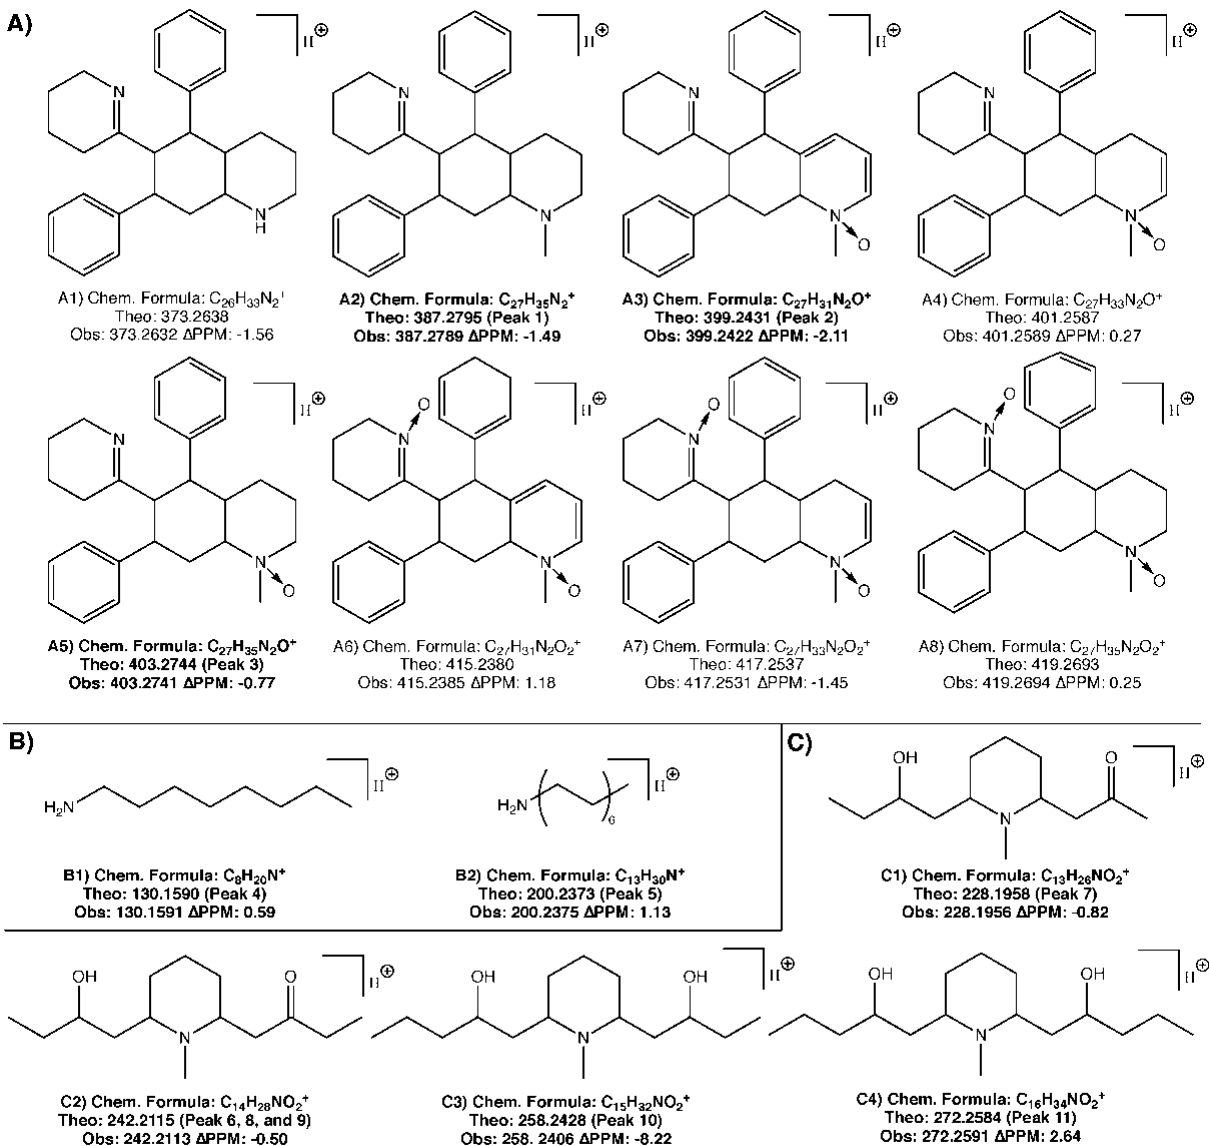

S6: Feature list with area counts

| row m/z  | WT-1     | WT-2     | WT-3     | DAT-1    | DAT-2    | DAT-3    | Mutant-1 | Mutant-2 | Mutant-3 |
|----------|----------|----------|----------|----------|----------|----------|----------|----------|----------|
| 90.0918  | 3.46E+06 | 3.55E+06 | 2.63E+06 | 1.41E+06 | 1.52E+06 | 1.24E+06 | 1.63E+06 | 1.91E+06 | 1.49E+06 |
| 91.0542  | 3.59E+06 | 1.70E+06 | 1.47E+06 | 5.87E+06 | 1.16E+06 | 3.20E+06 | 4.96E+06 | 6.29E+06 | 3.32E+06 |
| 97.0079  | 1.89E+07 | 4.10E+07 | 3.24E+07 | 2.67E+07 | 3.31E+07 | 3.83E+07 | 2.19E+07 | 3.36E+07 | 4.86E+07 |
| 99.0037  | 2.39E+06 | 4.87E+06 | 4.12E+06 | 2.61E+06 | 3.91E+06 | 5.36E+06 | 2.38E+06 | 4.23E+06 | 6.45E+06 |
| 102.0915 | 2.53E+07 | 1.86E+07 | 1.35E+07 | 2.45E+07 | 1.76E+07 | 1.76E+07 | 2.28E+07 | 1.94E+07 | 2.14E+07 |
| 102.9705 | 9.27E+06 | 3.50E+07 | 1.93E+07 | 1.14E+07 | 2.71E+07 | 3.98E+07 | 7.39E+06 | 1.63E+07 | 6.14E+07 |
| 104.0708 | 3.19E+06 | 2.29E+06 | 1.73E+06 | 1.27E+06 | 8.22E+05 | 1.14E+06 | 9.19E+05 | 1.65E+05 | 9.09E+05 |
| 104.1073 | 4.71E+06 | 2.87E+06 | 2.25E+06 | 9.10E+06 | 4.84E+06 | 5.66E+06 | 5.36E+06 | 3.08E+06 | 5.23E+06 |
| 105.0036 | 1.15E+07 | 1.96E+07 | 1.68E+07 | 1.22E+07 | 1.64E+07 | 2.46E+07 | 1.05E+07 | 1.96E+07 | 2.49E+07 |
| 106.0500 | 9.36E+05 | 4.52E+05 | 4.30E+05 | 8.85E+05 | 3.79E+06 | 5.05E+06 | 6.40E+05 | 2.64E+05 | 3.26E+05 |
| 111.0233 | 1.66E+07 | 2.29E+07 | 1.95E+07 | 2.07E+07 | 1.88E+07 | 2.28E+07 | 2.05E+07 | 2.13E+07 | 2.81E+07 |
| 113.0190 | 6.35E+06 | 6.47E+06 | 6.45E+06 | 7.43E+06 | 4.53E+06 | 6.24E+06 | 8.10E+06 | 5.41E+06 | 8.02E+06 |
| 120.9808 | 9.10E+06 | 5.99E+07 | 3.75E+07 | 1.22E+07 | 4.36E+07 | 6.54E+07 | 8.91E+06 | 2.74E+07 | 8.67E+07 |
| 121.0075 | 9.44E+06 | 3.81E+06 | 5.30E+06 | 7.17E+06 | 5.18E+06 | 2.79E+06 | 1.13E+07 | 5.44E+06 | 7.23E+06 |
| 122.0812 | 4.50E+06 | 1.41E+06 | 1.13E+06 | 1.51E+06 | 2.66E+05 | 3.93E+05 | 8.65E+06 | 2.15E+06 | 3.49E+06 |
| 125.0026 | 3.41E+06 | 1.61E+07 | 1.27E+07 | 4.54E+06 | 1.12E+07 | 1.34E+07 | 8.73E+06 | 1.18E+07 | 1.67E+07 |
| 126.9984 | 2.03E+06 | 4.94E+06 | 4.93E+06 | 2.46E+06 | 4.04E+06 | 4.39E+06 | 2.11E+06 | 4.79E+06 | 6.73E+06 |
| 132.1015 | 2.28E+06 | 2.46E+06 | 1.34E+06 | 4.32E+06 | 3.57E+06 | 4.78E+06 | 1.52E+06 | 1.23E+06 | 1.16E+06 |
| 133.0610 | 2.80E+06 | 1.15E+06 | 6.17E+05 | 5.06E+06 | 1.98E+06 | 2.30E+06 | 5.94E+06 | 2.19E+06 | 3.54E+06 |
| 134.9869 | 6.22E+06 | 7.92E+06 | 6.71E+06 | 7.44E+06 | 7.05E+06 | 8.44E+06 | 6.87E+06 | 5.27E+06 | 1.04E+07 |
| 136.0426 |          |          |          |          | 2.72E+07 | 3.55E+07 |          |          |          |
| 139.0182 | 1.71E+07 | 1.89E+07 | 1.53E+07 | 2.60E+07 | 1.56E+07 | 1.64E+07 | 2.07E+07 | 1.36E+07 | 1.88E+07 |
| 140.1437 | 6.10E+05 | 4.12E+05 | 3.33E+05 | 6.54E+06 | 3.61E+06 | 4.61E+06 | 6.93E+05 | 3.03E+05 | 5.71E+05 |
| 141.0139 | 2.42E+07 | 1.61E+07 | 1.55E+07 | 2.47E+07 | 1.19E+07 | 1.92E+07 | 2.48E+07 | 1.22E+07 | 2.11E+07 |
| 142.1577 | 2.41E+06 | 1.27E+06 | 8.11E+05 | 2.67E+06 | 1.00E+06 | 1.55E+06 | 4.34E+06 | 2.81E+06 | 4.85E+06 |
| 144.0478 | 5.10E+07 | 3.37E+07 | 2.86E+07 | 3.71E+07 | 2.19E+07 | 2.64E+07 | 6.81E+07 | 4.36E+07 | 6.40E+07 |
| 144.1383 | 1.86E+06 | 1.38E+06 | 1.07E+06 | 1.92E+07 | 1.26E+07 | 1.52E+07 | 1.56E+06 | 8.20E+05 | 1.34E+06 |
| 148.9756 | 6.29E+06 | 1.38E+07 | 7.61E+06 | 8.48E+06 | 9.34E+06 | 1.41E+07 | 5.75E+06 | 5.63E+06 | 1.76E+07 |
| 149.0026 | 8.75E+07 | 4.25E+07 | 3.71E+07 | 1.07E+08 | 3.61E+07 | 4.26E+07 | 4.80E+07 | 3.90E+07 | 5.23E+07 |
| 151.0541 |          | 5.18E+05 | 1.26E+06 |          | 2.71E+06 | 3.73E+06 |          | 4.43E+06 | 7.16E+06 |
| 151.0971 | 1.93E+06 | 1.57E+06 | 1.19E+06 | 1.09E+06 | 1.08E+06 | 1.26E+06 | 1.47E+06 | 1.09E+06 | 1.74E+06 |
| 152.9974 | 1.54E+07 | 3.07E+07 | 2.55E+07 | 2.25E+07 | 2.33E+07 | 2.78E+07 | 1.92E+07 | 2.47E+07 | 3.26E+07 |
| 155.0299 | 1.45E+07 | 8.23E+06 | 6.00E+06 | 1.78E+07 | 6.36E+06 | 8.67E+06 | 1.73E+07 | 5.64E+06 | 9.25E+06 |
| 156.0766 | 6.23E+05 | 1.96E+05 | 2.36E+05 | 3.62E+05 | 3.41E+06 | 3.69E+06 | 8.35E+05 | 2.64E+05 | 4.09E+05 |
| 158.1175 | 8.08E+05 | 4.81E+05 | 1.74E+05 | 4.58E+05 | 2.12E+05 | 3.12E+05 | 2.91E+06 | 1.75E+06 | 2.37E+06 |
| 158.1539 | 1.03E+07 | 7.20E+06 | 6.95E+06 | 8.59E+07 | 5.52E+07 | 7.07E+07 | 1.15E+07 | 6.96E+06 | 1.11E+07 |
| 167.0130 | 5.99E+07 | 4.36E+07 | 3.87E+07 | 8.51E+07 | 3.44E+07 | 4.21E+07 | 3.76E+07 | 3.26E+07 | 4.57E+07 |
| 170.1539 | 9.36E+05 | 6.32E+05 | 5.95E+05 | 1.38E+06 | 6.62E+05 | 1.29E+06 | 2.88E+06 | 9.93E+05 | 3.77E+06 |

|          |          |          |          |          |          |          |          |          |          |
|----------|----------|----------|----------|----------|----------|----------|----------|----------|----------|
| 172.1692 | 2.43E+06 | 2.05E+06 | 2.09E+06 | 8.10E+07 | 5.62E+07 | 7.34E+07 | 3.89E+07 | 2.77E+07 | 4.46E+07 |
| 174.1605 | 3.94E+06 | 3.35E+06 | 3.09E+06 | 1.62E+06 | 9.28E+05 | 1.28E+06 | 2.70E+04 | 1.79E+05 | 1.18E+05 |
| 180.1272 | 1.87E+06 | 1.97E+06 | 2.76E+06 | 5.23E+06 | 1.58E+06 | 5.22E+06 | 8.30E+06 | 6.57E+06 | 6.44E+06 |
| 181.0289 | 2.13E+07 | 1.01E+07 | 7.89E+06 | 8.50E+06 | 8.66E+06 | 1.01E+07 | 2.70E+07 | 6.62E+06 | 9.09E+06 |
| 181.0453 | 2.81E+05 | 7.68E+05 | 1.80E+06 | 2.77E+05 | 2.75E+06 | 4.95E+06 | 4.35E+05 | 3.87E+06 | 5.58E+06 |
| 186.1276 | 8.16E+06 | 1.43E+07 | 7.58E+06 | 7.38E+07 | 3.51E+07 | 1.76E+07 | 3.61E+07 | 6.38E+07 | 7.53E+07 |
| 186.1277 | 1.71E+07 | 7.91E+06 | 1.19E+07 | 1.86E+07 | 4.27E+07 | 5.32E+07 | 1.02E+08 | 2.40E+07 | 7.75E+07 |
| 186.1855 | 2.00E+05 | 1.15E+05 | 1.06E+05 | 1.53E+07 | 3.86E+06 | 1.22E+07 | 1.12E+06 | 2.25E+06 | 3.25E+06 |
| 189.0335 | 2.17E+05 | 1.74E+06 | 5.13E+06 | 1.42E+05 | 1.42E+07 | 2.08E+07 | 6.91E+04 | 1.76E+07 | 2.89E+07 |
| 193.1356 | 3.58E+06 | 2.78E+06 | 5.30E+05 | 2.65E+07 | 1.22E+07 | 1.65E+07 | 2.93E+07 | 2.24E+07 | 2.81E+07 |
| 193.1360 | 4.44E+06 | 9.15E+05 | 5.20E+05 | 1.57E+07 | 6.58E+06 | 2.94E+06 | 1.13E+07 | 7.58E+05 | 5.91E+06 |
| 199.0942 | 8.79E+06 | 3.11E+06 | 8.90E+06 | 6.87E+06 | 2.53E+06 | 9.15E+06 | 1.67E+07 | 2.69E+06 | 5.66E+06 |
| 200.1253 | 2.11E+05 | 1.18E+06 | 1.01E+06 | 2.16E+07 | 1.66E+07 | 2.44E+07 | 4.06E+06 | 4.13E+06 | 6.60E+06 |
| 200.1254 | 1.05E+06 | 1.18E+06 | 1.01E+06 | 2.40E+07 | 1.09E+07 | 2.30E+07 | 3.87E+06 | 4.13E+06 | 6.78E+06 |
| 201.0442 | 1.82E+05 | 1.87E+05 | 3.42E+05 | 2.83E+06 | 2.79E+06 | 3.70E+06 | 3.12E+06 | 2.91E+06 | 4.39E+06 |
| 201.1500 | 3.19E+06 | 2.26E+06 | 7.06E+05 | 1.11E+07 | 5.19E+06 | 3.28E+06 | 6.58E+06 | 4.17E+06 | 4.90E+06 |
| 201.1508 | 3.29E+06 | 1.54E+05 | 4.85E+05 | 5.01E+06 | 1.90E+06 | 3.71E+06 | 6.73E+06 | 7.30E+05 | 2.08E+06 |
| 207.0443 | 1.45E+05 | 8.17E+05 | 1.60E+06 | 2.02E+05 | 4.61E+06 | 7.89E+06 | 2.73E+05 | 3.57E+06 | 9.55E+06 |
| 213.1099 | 6.54E+07 | 8.23E+07 | 1.10E+08 | 4.13E+07 | 3.74E+07 | 5.18E+07 | 3.45E+07 | 8.30E+07 | 2.52E+07 |
| 214.1134 | 1.22E+06 | 8.31E+06 | 7.40E+06 | 1.79E+07 | 8.75E+06 | 5.10E+06 | 3.68E+06 | 8.21E+06 | 4.06E+06 |
| 216.0431 |          |          |          | 7.31E+05 | 2.84E+05 | 3.96E+05 | 6.25E+06 | 3.41E+06 | 4.89E+06 |
| 216.1569 | 1.46E+05 | 2.39E+06 | 1.76E+06 | 5.92E+06 | 4.11E+06 | 4.60E+06 | 2.12E+04 | 3.91E+06 | 5.43E+06 |
| 216.1959 | 1.93E+07 | 1.55E+07 | 1.29E+07 | 6.07E+06 | 7.82E+06 | 4.37E+06 | 9.01E+05 | 1.60E+06 | 2.78E+06 |
| 216.1962 | 5.38E+05 | 1.62E+07 | 1.33E+07 | 1.25E+07 | 3.60E+06 | 1.09E+07 | 4.78E+05 | 1.60E+06 | 2.78E+06 |
| 219.1357 | 3.58E+05 | 3.47E+05 | 7.51E+05 | 2.07E+07 | 9.01E+06 | 1.76E+07 | 9.85E+05 | 5.87E+05 | 1.64E+06 |
| 224.1539 | 5.12E+05 | 2.04E+06 | 2.06E+06 | 6.25E+06 | 1.06E+07 | 1.49E+07 | 9.88E+06 | 7.07E+06 | 1.20E+07 |
| 229.1985 | 7.75E+06 | 5.57E+06 | 5.08E+06 | 2.31E+07 | 1.35E+07 | 1.91E+07 | 3.79E+07 | 2.66E+07 | 4.08E+07 |
| 230.2113 | 9.03E+07 | 6.71E+07 | 5.14E+07 | 7.12E+07 | 2.78E+07 | 1.21E+07 | 6.78E+06 | 2.88E+07 | 4.69E+07 |
| 230.2113 | 8.33E+07 | 6.89E+06 | 7.84E+05 | 3.99E+07 | 1.00E+07 | 5.56E+07 | 1.33E+07 | 7.96E+06 | 1.17E+07 |
| 230.2116 | 7.16E+07 | 1.89E+07 | 8.14E+06 | 1.78E+07 | 4.24E+07 | 3.41E+07 | 3.81E+07 | 5.36E+06 | 1.66E+07 |
| 232.1524 | 1.19E+05 | 3.42E+05 | 1.90E+05 | 3.98E+06 | 8.98E+05 | 1.12E+06 | 1.69E+05 | 4.41E+05 | 5.78E+05 |
| 235.0928 | 3.86E+06 | 1.56E+06 | 1.33E+06 | 4.43E+06 | 1.16E+06 | 1.87E+06 | 4.78E+06 | 1.16E+06 | 2.00E+06 |
| 240.1955 | 4.25E+06 | 2.90E+06 | 2.76E+06 | 3.39E+06 | 1.86E+06 | 4.98E+05 | 6.01E+06 | 3.22E+06 | 6.96E+06 |
| 242.2830 | 7.61E+06 | 1.43E+05 | 2.45E+06 | 1.18E+07 | 1.27E+05 | 1.83E+06 | 6.50E+08 | 4.26E+08 | 7.17E+08 |
| 244.1908 | 8.72E+06 | 6.62E+06 | 6.07E+06 | 6.39E+06 | 4.74E+06 | 1.54E+07 | 1.37E+07 | 1.07E+07 | 4.82E+07 |
| 244.1909 | 3.87E+05 | 5.28E+06 | 4.64E+06 | 1.72E+07 | 1.20E+07 | 5.18E+06 | 4.08E+07 | 3.12E+07 | 1.59E+07 |
| 244.2268 | 1.38E+07 | 4.46E+07 | 9.84E+06 | 1.83E+08 | 5.01E+07 | 1.43E+08 | 9.23E+07 | 1.36E+08 | 3.37E+08 |
| 244.2270 | 7.30E+07 | 5.58E+07 | 4.65E+07 | 1.61E+08 | 1.14E+08 | 6.74E+07 | 2.79E+08 | 6.09E+07 | 1.01E+08 |
| 244.2271 | 3.70E+07 | 2.65E+07 | 2.41E+07 | 6.48E+07 | 9.46E+07 | 1.28E+08 | 5.19E+07 | 2.15E+08 | 2.95E+08 |
| 245.1883 | 1.09E+07 | 4.09E+06 | 2.30E+06 | 1.76E+07 | 3.86E+06 | 2.07E+06 | 2.03E+06 | 5.74E+06 | 7.27E+06 |
| 247.0756 | 1.68E+07 | 9.31E+06 | 7.57E+06 | 2.25E+07 | 7.64E+06 | 9.33E+06 | 2.40E+07 | 4.42E+06 | 1.09E+07 |

|          |          |          |          |          |          |          |          |          |          |
|----------|----------|----------|----------|----------|----------|----------|----------|----------|----------|
| 254.2111 | 6.05E+05 | 2.53E+05 | 2.86E+05 | 1.99E+06 | 3.84E+05 | 2.19E+05 | 1.40E+07 | 9.01E+06 | 1.45E+07 |
| 256.2269 | 2.40E+07 | 9.38E+07 | 9.13E+07 | 2.79E+08 | 1.77E+08 | 5.95E+07 | 8.97E+08 | 6.52E+08 | 1.02E+09 |
| 256.2270 | 2.40E+07 | 1.63E+07 | 3.63E+07 | 7.13E+07 | 4.61E+07 | 2.26E+08 | 1.90E+08 | 1.32E+08 | 7.37E+08 |
| 258.2068 | 3.69E+06 | 5.37E+07 | 5.03E+07 | 4.67E+07 | 2.68E+07 | 1.34E+07 | 8.62E+06 | 3.59E+07 | 5.79E+07 |
| 259.2076 | 2.75E+07 | 8.08E+05 | 1.13E+06 | 3.91E+06 | 1.13E+06 | 5.79E+05 | 2.13E+06 | 6.37E+05 | 1.45E+06 |
| 259.2454 | 1.64E+07 | 8.39E+06 | 5.88E+06 | 1.26E+08 | 4.77E+07 | 6.26E+07 | 1.56E+08 | 8.35E+07 | 1.79E+08 |
| 259.6726 | 9.65E+04 | 4.73E+05 | 5.12E+05 | 6.65E+06 | 4.77E+06 | 4.06E+06 | 3.25E+07 | 2.32E+07 | 3.53E+07 |
| 260.2224 | 2.28E+07 | 1.54E+07 | 1.26E+07 | 1.57E+07 | 8.01E+06 | 1.00E+07 | 5.87E+06 | 3.58E+06 | 6.58E+06 |
| 260.2487 | 3.75E+05 | 1.09E+06 | 4.20E+05 | 6.86E+05 | 5.89E+06 | 9.20E+06 | 1.03E+06 | 2.08E+06 | 1.65E+07 |
| 261.0914 | 1.00E+07 | 3.07E+06 | 2.79E+06 | 1.53E+07 | 3.14E+06 | 3.85E+06 | 6.11E+06 | 3.34E+06 | 3.05E+06 |
| 270.2428 | 4.58E+06 | 2.68E+06 | 2.80E+06 | 1.56E+07 | 9.36E+06 | 1.15E+07 | 4.88E+07 | 4.44E+07 | 4.44E+07 |
| 270.3152 | 3.83E+07 | 2.59E+07 | 1.88E+07 | 3.30E+07 | 1.54E+07 | 2.65E+07 | 3.59E+07 | 2.46E+07 | 3.38E+07 |
| 272.2217 | 2.98E+07 | 2.22E+07 | 1.94E+07 | 3.11E+07 | 1.95E+07 | 2.59E+07 | 8.40E+07 | 5.37E+07 | 8.76E+07 |
| 273.1904 | 3.88E+06 | 1.42E+06 | 2.46E+06 | 1.64E+06 | 5.90E+05 | 3.70E+06 | 8.96E+06 | 1.65E+06 | 1.25E+06 |
| 273.2177 | 3.83E+06 | 5.65E+05 | 1.14E+06 | 2.70E+06 | 1.05E+06 | 2.46E+06 | 1.50E+06 | 8.89E+05 | 3.36E+06 |
| 273.2252 | 5.46E+06 | 4.57E+06 | 4.95E+06 | 6.61E+06 | 7.45E+06 | 7.43E+06 | 1.84E+07 | 8.93E+06 | 1.97E+07 |
| 273.2617 | 4.57E+06 | 4.05E+05 | 1.50E+06 | 6.90E+07 | 4.34E+07 | 7.71E+05 | 1.78E+08 | 1.60E+06 | 2.21E+08 |
| 274.2370 | 9.28E+06 | 2.23E+06 | 4.42E+05 | 6.38E+07 | 3.55E+07 | 4.53E+07 | 3.14E+07 | 1.62E+07 | 3.06E+07 |
| 281.1882 | 1.53E+05 | 6.32E+04 | 8.17E+04 | 9.63E+04 | 2.90E+05 | 4.90E+05 | 1.89E+06 | 7.01E+04 | 3.27E+05 |
| 282.2791 | 1.18E+07 | 7.71E+06 | 7.13E+06 | 8.04E+06 | 4.48E+06 | 5.63E+06 | 7.17E+04 | 1.35E+05 | 2.46E+05 |
| 286.2381 | 1.35E+06 | 1.53E+06 | 6.55E+05 | 2.19E+07 | 1.32E+07 | 1.57E+07 | 2.04E+07 | 1.45E+07 | 2.77E+07 |
| 288.2179 | 1.26E+07 | 9.19E+06 | 7.19E+06 | 4.12E+05 | 2.70E+06 | 4.00E+06 | 1.18E+06 | 7.31E+06 | 8.07E+06 |
| 288.2529 | 1.81E+07 | 1.31E+07 | 2.44E+05 | 1.24E+08 | 7.44E+07 | 1.30E+06 | 7.56E+07 | 5.26E+07 | 8.16E+07 |
| 288.5204 | 1.23E+06 | 8.27E+05 | 6.02E+05 | 7.28E+06 | 6.06E+06 | 6.42E+06 | 7.87E+06 | 6.44E+06 | 9.81E+06 |
| 289.2040 | 2.55E+04 | 6.99E+05 | 1.90E+06 | 2.71E+05 | 9.75E+05 | 1.28E+06 | 8.55E+06 | 3.56E+06 | 9.97E+05 |
| 289.2561 | 2.66E+06 | 1.86E+06 | 1.95E+06 | 2.76E+07 | 1.42E+07 | 1.99E+07 | 1.39E+07 | 9.09E+06 | 1.28E+07 |
| 293.1343 | 2.44E+04 | 2.33E+05 | 1.89E+05 | 9.16E+06 | 1.67E+06 | 4.48E+06 | 7.78E+06 | 3.41E+06 | 5.29E+06 |
| 296.2948 | 3.84E+05 | 2.10E+06 | 1.30E+06 | 5.80E+06 | 8.30E+05 | 3.51E+06 | 6.36E+05 | 1.04E+05 | 2.05E+05 |
| 299.1612 | 1.39E+07 | 1.10E+07 | 1.79E+07 | 1.38E+07 | 6.75E+06 | 6.72E+06 | 1.10E+07 | 3.73E+06 | 2.70E+06 |
| 302.2324 | 2.94E+06 | 5.16E+05 | 5.55E+05 | 2.52E+06 | 5.52E+05 | 2.77E+05 | 4.53E+06 | 2.20E+05 | 1.45E+06 |
| 302.2694 | 3.88E+05 | 6.74E+04 | 2.03E+05 | 6.29E+06 | 5.52E+05 | 6.16E+05 | 3.01E+05 | 3.92E+05 | 4.63E+05 |
| 306.2129 | 3.53E+06 | 5.67E+05 | 4.91E+04 | 5.48E+06 | 2.59E+06 | 3.36E+06 | 5.93E+06 | 9.47E+05 | 2.72E+06 |
| 310.1655 | 2.37E+06 | 7.27E+06 | 1.22E+06 | 8.16E+05 | 4.89E+05 | 2.53E+05 | 1.03E+07 | 2.67E+06 | 3.97E+06 |
| 313.1913 | 1.08E+05 | 2.20E+04 | 1.92E+04 | 4.12E+05 | 6.16E+05 | 1.03E+06 | 1.32E+07 | 5.21E+05 | 1.04E+07 |
| 322.2371 | 1.59E+05 | 2.50E+05 | 2.90E+05 | 4.46E+06 | 1.86E+06 | 2.71E+06 | 5.37E+06 | 2.50E+06 | 8.27E+06 |
| 324.2076 |          | 6.28E+04 | 2.08E+05 |          | 2.06E+04 | 3.42E+05 | 2.63E+04 | 3.85E+04 | 4.11E+06 |
| 325.1336 | 1.44E+07 | 6.82E+06 | 2.15E+05 | 3.15E+06 | 2.44E+05 |          |          |          |          |
| 344.2389 | 2.48E+05 | 2.23E+05 | 2.21E+05 | 3.05E+05 | 4.01E+06 | 6.26E+05 | 1.20E+07 | 1.27E+07 | 7.06E+06 |
| 349.2278 | 7.08E+05 | 3.46E+05 | 1.09E+06 | 5.49E+06 | 1.08E+05 | 4.77E+06 | 2.83E+05 | 5.03E+05 | 1.49E+05 |
| 366.3362 |          |          |          | 1.25E+06 | 4.40E+05 | 3.03E+05 | 8.41E+06 | 3.80E+05 | 1.39E+06 |
| 367.3323 | 6.12E+06 | 8.23E+05 | 4.19E+06 | 1.20E+07 | 6.94E+06 | 8.75E+06 | 2.33E+05 | 1.67E+05 | 3.68E+05 |

|                    |          |          |          |          |          |          |          |          |          |
|--------------------|----------|----------|----------|----------|----------|----------|----------|----------|----------|
| 381.3479           | 2.62E+05 | 7.74E+05 | 7.13E+05 | 1.24E+07 | 2.48E+06 | 3.75E+05 | 1.40E+05 | 2.32E+05 | 3.68E+05 |
| 432.2771           | 1.37E+06 | 1.28E+06 | 1.14E+06 | 1.28E+07 | 9.18E+06 | 1.39E+07 | 1.09E+07 | 9.22E+06 | 1.67E+07 |
| 451.3899           | 1.33E+05 | 2.03E+05 | 8.10E+04 |          | 2.98E+05 | 2.20E+05 | 2.18E+07 | 8.88E+06 | 1.35E+07 |
| 373.2638, 187.1359 | 8.83E+07 | 8.30E+07 | 7.34E+07 | 1.05E+08 | 7.42E+07 | 9.33E+07 | 1.81E+08 | 1.50E+08 | 2.07E+08 |
| 387.2795, 194.1415 | 1.89E+09 | 1.75E+09 | 1.63E+09 | 3.78E+09 | 3.05E+09 | 3.52E+09 | 5.35E+09 | 4.62E+09 | 5.72E+09 |
| 399.2822, 200.1446 | 9.19E+07 | 6.64E+07 | 6.01E+07 | 1.96E+08 | 1.21E+08 | 1.54E+08 | 1.76E+08 | 1.16E+08 | 1.89E+08 |
| 401.2587, 201.1284 | 1.03E+07 | 1.06E+07 | 7.39E+06 | 5.30E+07 | 3.51E+07 | 5.03E+07 | 6.66E+07 | 4.85E+07 | 8.09E+07 |
| 403.2740, 202.1410 | 9.36E+07 | 8.29E+07 | 7.49E+07 | 4.45E+08 | 3.03E+08 | 4.03E+08 | 5.57E+08 | 4.14E+08 | 6.21E+08 |
| 415.2749, 208.1415 | 1.65E+07 | 1.43E+07 | 1.17E+07 | 8.21E+07 | 5.16E+07 | 7.45E+07 | 3.19E+07 | 2.34E+07 | 3.74E+07 |
| 417.2537, 209.1308 | 8.03E+06 | 6.53E+06 | 5.25E+06 | 3.25E+06 | 1.81E+06 | 2.00E+06 | 4.37E+06 | 2.80E+06 | 4.56E+06 |
| 419.2693, 210.1383 | 8.82E+05 | 7.24E+05 | 6.44E+05 | 7.61E+06 | 6.93E+06 | 1.01E+07 | 1.05E+07 | 9.87E+06 | 1.66E+07 |
| 130.1595           | 1.80E+08 | 1.39E+08 | 1.10E+08 | 1.78E+08 | 1.12E+08 | 1.62E+08 | 1.82E+08 | 1.28E+08 | 2.06E+08 |
| 200.2363           | 2.21E+08 | 1.65E+08 | 1.48E+08 | 2.44E+08 | 1.50E+08 | 2.14E+08 | 2.27E+08 | 1.60E+08 | 2.71E+08 |
| 228.1967           | 9.22E+07 | 6.57E+07 | 5.74E+07 | 2.18E+08 | 1.40E+08 | 1.74E+08 | 3.24E+08 | 2.27E+08 | 3.57E+08 |
| 242.2115 isomer    | 1.11E+08 | 7.91E+07 | 6.41E+07 | 2.15E+08 | 1.32E+08 | 1.60E+08 | 4.28E+08 | 2.98E+08 | 5.02E+08 |
| 242.2115 isomer    | 7.14E+07 | 5.09E+07 | 4.56E+07 | 1.20E+08 | 7.73E+07 | 1.03E+08 | 2.73E+08 | 1.86E+08 | 3.14E+08 |
| 242.2115 isomer    | 3.94E+08 | 3.12E+08 | 2.67E+08 | 6.36E+08 | 4.14E+08 | 5.17E+08 | 1.50E+09 | 1.09E+09 | 1.69E+09 |
| 258.2437           | 1.34E+08 | 9.53E+07 | 7.79E+07 | 1.01E+09 | 6.28E+08 | 8.27E+08 | 1.35E+09 | 9.50E+08 | 1.55E+09 |
| 272.2574           | 8.76E+07 | 6.08E+07 | 5.61E+07 | 4.69E+08 | 2.87E+08 | 3.91E+08 | 1.25E+09 | 8.25E+08 | 1.36E+09 |

**S7:** Confidence interval calculation for error in lobinaline concentration from calibration curve

$$\mu_{C_A} = C_A \pm t(s_{C_A})$$

$C_A$  = analyte concentration from the regression equation ( $y = b_1x + b_0$ )

$t$  =  $t$  value based on the desired level of confidence and  $n-2$  degrees of freedom (in this case, at 95% confidence and  $n-2 = 8$ ;  $t = 2.306$ )

$$s_{C_A} = \frac{(stdev_{reg})}{b_1} \sqrt{\left(\frac{1}{m}\right) + \left(\frac{1}{n}\right) + \frac{(\bar{Y} - \bar{y})^2}{(b_1)^2 \sum_i (x_i - \bar{x})^2}}$$

$(stdev_{reg}) = \sqrt{\frac{\sum (y_i - \hat{y}_i)^2}{n-2}}$  where  $y_i$  = average response for the  $i^{\text{th}}$  standard and  $\hat{y}_i$  = the calculated response for that standard using the regression equation

$m$  = number of internal standard replicates

$n$  = number of points in the curve

$\bar{Y}$  = response for analyte in sample

$\bar{y}$  = average response for analyte in all standards

$\sum_i (x_i - \bar{x})^2$  = standard sum of squares for concentration range of internal standards.



**S8:** Expanded version of figure 8 displaying bar graphs of the normalized area counts for the prioritized list

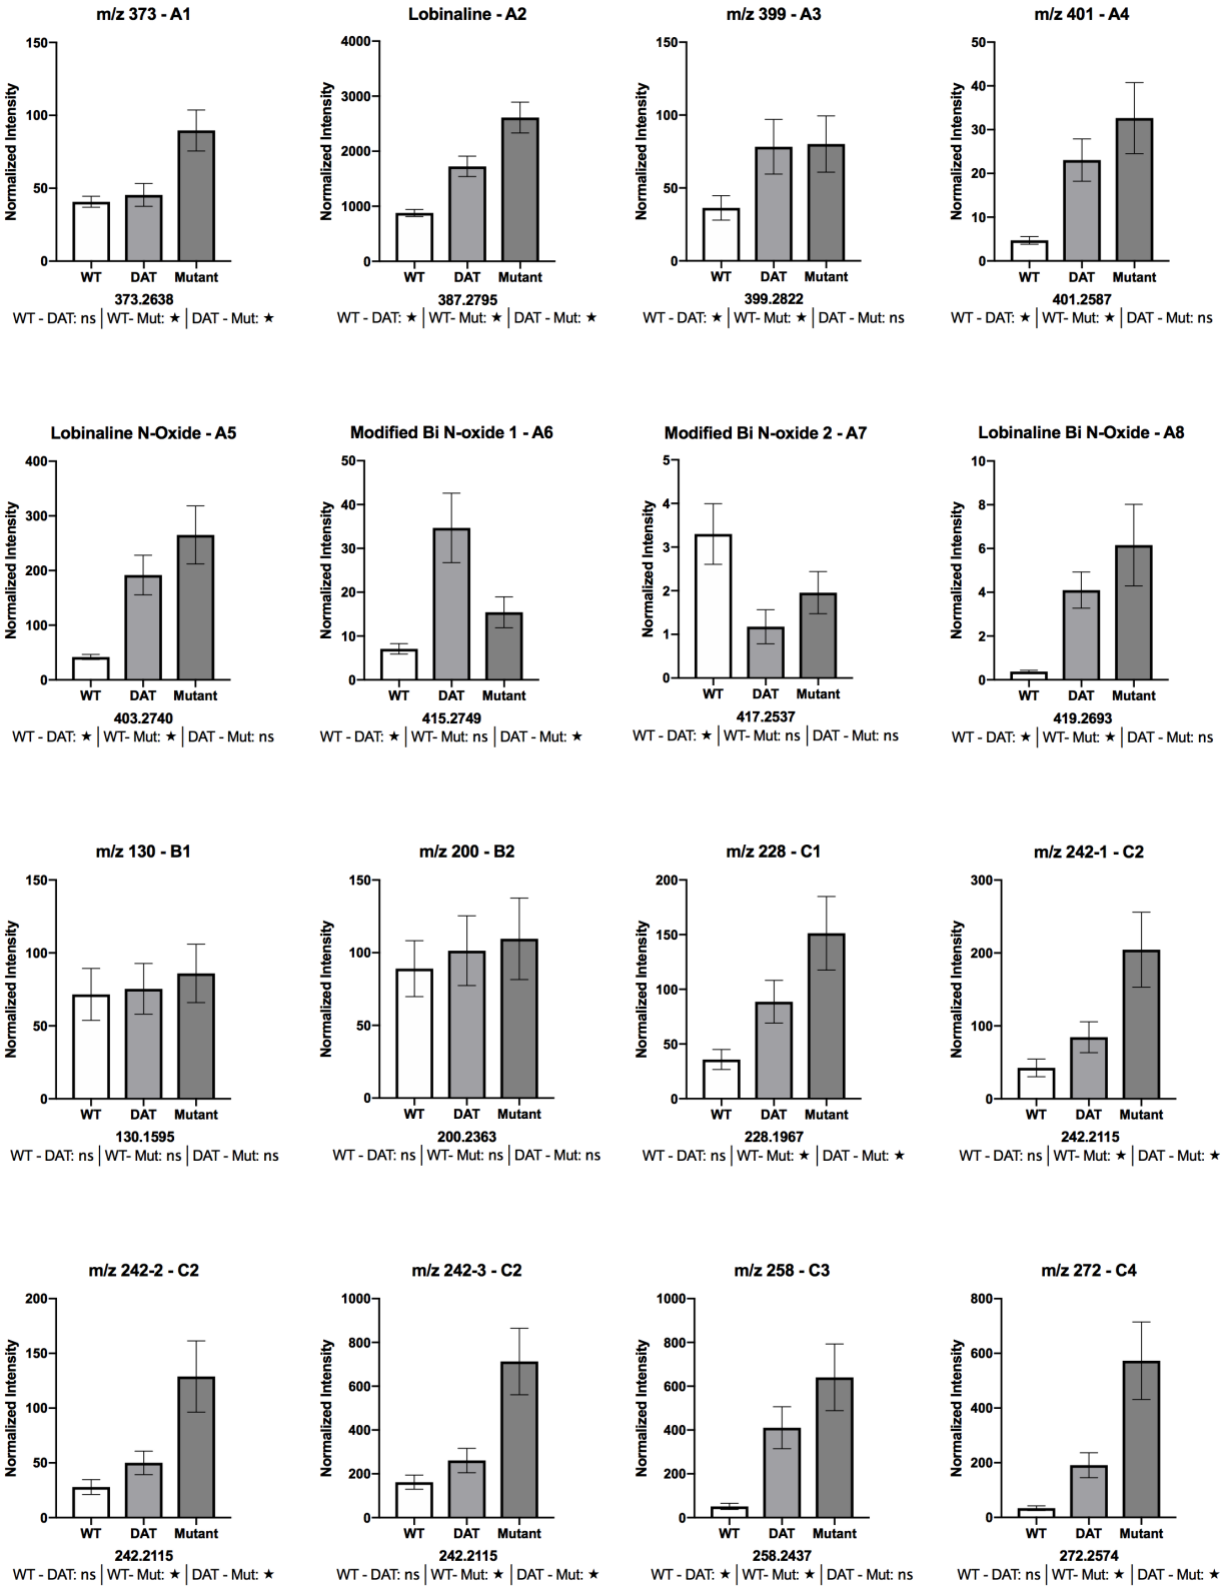

## S9: Normalized feature list

| Normalized Data set for all 139 features - average area count for m/z 200.2363: 2.00E+08 |        |        |        |        |        |        |          |          |          |
|------------------------------------------------------------------------------------------|--------|--------|--------|--------|--------|--------|----------|----------|----------|
| row m/z                                                                                  | WT-1   | WT-2   | WT-3   | DAT-1  | DAT-2  | DAT-3  | Mutant-1 | Mutant-2 | Mutant-3 |
| 90.0918                                                                                  | 1.728  | 1.771  | 1.316  | 0.706  | 0.757  | 0.622  | 0.815    | 0.957    | 0.742    |
| 91.0542                                                                                  | 1.794  | 0.847  | 0.735  | 2.932  | 0.579  | 1.597  | 2.481    | 3.145    | 1.661    |
| 97.0079                                                                                  | 9.462  | 20.465 | 16.211 | 13.363 | 16.523 | 19.122 | 10.964   | 16.763   | 24.292   |
| 99.0037                                                                                  | 1.196  | 2.435  | 2.058  | 1.302  | 1.952  | 2.680  | 1.187    | 2.114    | 3.221    |
| 102.0915                                                                                 | 12.642 | 9.273  | 6.738  | 12.253 | 8.813  | 8.800  | 11.387   | 9.687    | 10.696   |
| 102.9705                                                                                 | 4.632  | 17.499 | 9.649  | 5.682  | 13.559 | 19.904 | 3.692    | 8.162    | 30.668   |
| 104.0708                                                                                 | 1.592  | 1.142  | 0.866  | 0.634  | 0.410  | 0.567  | 0.459    | 0.082    | 0.454    |
| 104.1073                                                                                 | 2.356  | 1.436  | 1.123  | 4.546  | 2.418  | 2.827  | 2.677    | 1.541    | 2.612    |
| 105.0036                                                                                 | 5.764  | 9.814  | 8.382  | 6.118  | 8.204  | 12.292 | 5.255    | 9.777    | 12.460   |
| 106.0500                                                                                 | 0.468  | 0.226  | 0.215  | 0.442  | 1.893  | 2.524  | 0.320    | 0.132    | 0.163    |
| 111.0233                                                                                 | 8.294  | 11.457 | 9.733  | 10.362 | 9.416  | 11.399 | 10.263   | 10.660   | 14.062   |
| 113.0190                                                                                 | 3.175  | 3.234  | 3.222  | 3.712  | 2.264  | 3.118  | 4.049    | 2.702    | 4.007    |
| 120.9808                                                                                 | 4.545  | 29.947 | 18.714 | 6.086  | 21.789 | 32.652 | 4.452    | 13.668   | 43.338   |
| 121.0075                                                                                 | 4.716  | 1.906  | 2.649  | 3.585  | 2.590  | 1.392  | 5.649    | 2.716    | 3.612    |
| 122.0812                                                                                 | 2.248  | 0.704  | 0.567  | 0.756  | 0.133  | 0.196  | 4.324    | 1.073    | 1.742    |
| 125.0026                                                                                 | 1.704  | 8.068  | 6.349  | 2.267  | 5.619  | 6.685  | 4.364    | 5.880    | 8.319    |
| 126.9984                                                                                 | 1.015  | 2.466  | 2.462  | 1.229  | 2.018  | 2.193  | 1.054    | 2.392    | 3.363    |
| 132.1015                                                                                 | 1.138  | 1.229  | 0.672  | 2.159  | 1.781  | 2.388  | 0.761    | 0.612    | 0.578    |
| 133.0610                                                                                 | 1.400  | 0.574  | 0.308  | 2.529  | 0.992  | 1.149  | 2.967    | 1.097    | 1.767    |
| 134.9869                                                                                 | 3.109  | 3.956  | 3.350  | 3.716  | 3.524  | 4.217  | 3.431    | 2.631    | 5.175    |
| 136.0426                                                                                 | 0.000  | 0.000  | 0.000  | 0.000  | 13.609 | 17.726 | 0.000    | 0.000    | 0.000    |
| 139.0182                                                                                 | 8.566  | 9.429  | 7.652  | 12.969 | 7.782  | 8.194  | 10.354   | 6.777    | 9.385    |
| 140.1437                                                                                 | 0.305  | 0.206  | 0.167  | 3.269  | 1.805  | 2.302  | 0.346    | 0.152    | 0.285    |
| 141.0139                                                                                 | 12.077 | 8.022  | 7.750  | 12.335 | 5.926  | 9.598  | 12.379   | 6.111    | 10.559   |
| 142.1577                                                                                 | 1.205  | 0.632  | 0.405  | 1.332  | 0.500  | 0.775  | 2.167    | 1.405    | 2.423    |
| 144.0478                                                                                 | 25.481 | 16.857 | 14.289 | 18.516 | 10.959 | 13.213 | 34.047   | 21.760   | 31.975   |
| 144.1383                                                                                 | 0.929  | 0.691  | 0.535  | 9.601  | 6.301  | 7.589  | 0.781    | 0.410    | 0.668    |
| 148.9756                                                                                 | 3.144  | 6.908  | 3.802  | 4.237  | 4.668  | 7.049  | 2.872    | 2.814    | 8.808    |
| 149.0026                                                                                 | 43.735 | 21.255 | 18.548 | 53.391 | 18.030 | 21.279 | 24.006   | 19.510   | 26.110   |
| 151.0541                                                                                 | 0.000  | 0.259  | 0.627  | 0.000  | 1.354  | 1.861  | 0.000    | 2.216    | 3.579    |
| 151.0971                                                                                 | 0.965  | 0.783  | 0.594  | 0.545  | 0.538  | 0.627  | 0.732    | 0.544    | 0.867    |
| 152.9974                                                                                 | 7.705  | 15.315 | 12.723 | 11.253 | 11.632 | 13.879 | 9.616    | 12.353   | 16.311   |
| 155.0299                                                                                 | 7.231  | 4.112  | 3.000  | 8.916  | 3.176  | 4.331  | 8.659    | 2.820    | 4.622    |
| 156.0766                                                                                 | 0.311  | 0.098  | 0.118  | 0.181  | 1.705  | 1.842  | 0.417    | 0.132    | 0.204    |
| 158.1175                                                                                 | 0.404  | 0.241  | 0.087  | 0.229  | 0.106  | 0.156  | 1.455    | 0.874    | 1.186    |
| 158.1539                                                                                 | 5.131  | 3.599  | 3.473  | 42.927 | 27.603 | 35.305 | 5.768    | 3.476    | 5.557    |
| 167.0130                                                                                 | 29.913 | 21.806 | 19.312 | 42.521 | 17.182 | 21.018 | 18.762   | 16.264   | 22.823   |

|          |        |        |        |        |        |        |         |         |         |
|----------|--------|--------|--------|--------|--------|--------|---------|---------|---------|
| 170.1539 | 0.468  | 0.316  | 0.297  | 0.692  | 0.331  | 0.643  | 1.439   | 0.496   | 1.883   |
| 172.1692 | 1.213  | 1.025  | 1.047  | 40.483 | 28.069 | 36.687 | 19.447  | 13.831  | 22.302  |
| 174.1605 | 1.969  | 1.674  | 1.543  | 0.808  | 0.464  | 0.640  | 0.013   | 0.090   | 0.059   |
| 180.1272 | 0.934  | 0.985  | 1.381  | 2.615  | 0.788  | 2.609  | 4.147   | 3.283   | 3.218   |
| 181.0289 | 10.658 | 5.063  | 3.944  | 4.246  | 4.329  | 5.028  | 13.483  | 3.309   | 4.540   |
| 181.0453 | 0.141  | 0.384  | 0.901  | 0.138  | 1.376  | 2.473  | 0.217   | 1.934   | 2.786   |
| 186.1276 | 4.075  | 7.167  | 3.787  | 36.859 | 17.513 | 8.811  | 18.041  | 31.881  | 37.636  |
| 186.1277 | 8.532  | 3.952  | 5.938  | 9.315  | 21.347 | 26.559 | 50.975  | 11.999  | 38.745  |
| 186.1855 | 0.100  | 0.057  | 0.053  | 7.632  | 1.928  | 6.090  | 0.558   | 1.122   | 1.624   |
| 189.0335 | 0.109  | 0.869  | 2.563  | 0.071  | 7.093  | 10.390 | 0.035   | 8.807   | 14.455  |
| 193.1356 | 1.788  | 1.387  | 0.265  | 13.241 | 6.099  | 8.246  | 14.637  | 11.186  | 14.036  |
| 193.1360 | 2.220  | 0.457  | 0.260  | 7.844  | 3.287  | 1.469  | 5.621   | 0.379   | 2.955   |
| 199.0942 | 4.391  | 1.553  | 4.444  | 3.434  | 1.263  | 4.570  | 8.334   | 1.342   | 2.830   |
| 200.1253 | 0.105  | 0.591  | 0.506  | 10.802 | 8.283  | 12.192 | 2.029   | 2.064   | 3.297   |
| 200.1254 | 0.526  | 0.591  | 0.506  | 12.012 | 5.464  | 11.487 | 1.936   | 2.064   | 3.386   |
| 201.0442 | 0.091  | 0.094  | 0.171  | 1.415  | 1.393  | 1.849  | 1.558   | 1.453   | 2.193   |
| 201.1500 | 1.593  | 1.128  | 0.353  | 5.549  | 2.594  | 1.639  | 3.289   | 2.086   | 2.448   |
| 201.1508 | 1.643  | 0.077  | 0.242  | 2.504  | 0.947  | 1.852  | 3.361   | 0.365   | 1.040   |
| 207.0443 | 0.072  | 0.408  | 0.798  | 0.101  | 2.305  | 3.944  | 0.136   | 1.785   | 4.770   |
| 213.1099 | 32.693 | 41.099 | 54.816 | 20.652 | 18.685 | 25.870 | 17.252  | 41.486  | 12.591  |
| 214.1134 | 0.608  | 4.151  | 3.695  | 8.954  | 4.373  | 2.548  | 1.839   | 4.104   | 2.031   |
| 216.0431 | 0.000  | 0.000  | 0.000  | 0.365  | 0.142  | 0.198  | 3.125   | 1.704   | 2.444   |
| 216.1569 | 0.073  | 1.192  | 0.879  | 2.957  | 2.052  | 2.299  | 0.011   | 1.955   | 2.712   |
| 216.1959 | 9.662  | 7.719  | 6.427  | 3.031  | 3.910  | 2.184  | 0.450   | 0.797   | 1.388   |
| 216.1962 | 0.269  | 8.105  | 6.633  | 6.259  | 1.801  | 5.441  | 0.239   | 0.797   | 1.388   |
| 219.1357 | 0.179  | 0.173  | 0.375  | 10.339 | 4.501  | 8.786  | 0.492   | 0.293   | 0.820   |
| 224.1539 | 0.256  | 1.021  | 1.030  | 3.122  | 5.307  | 7.462  | 4.938   | 3.532   | 5.976   |
| 229.1985 | 3.874  | 2.783  | 2.540  | 11.518 | 6.751  | 9.539  | 18.929  | 13.287  | 20.405  |
| 230.2113 | 45.103 | 33.506 | 25.683 | 35.586 | 13.878 | 6.021  | 3.387   | 14.406  | 23.443  |
| 230.2113 | 41.613 | 3.440  | 0.391  | 19.957 | 5.019  | 27.799 | 6.640   | 3.976   | 5.831   |
| 230.2116 | 35.774 | 9.463  | 4.067  | 8.912  | 21.184 | 17.021 | 19.014  | 2.677   | 8.316   |
| 232.1524 | 0.059  | 0.171  | 0.095  | 1.991  | 0.449  | 0.557  | 0.085   | 0.220   | 0.289   |
| 235.0928 | 1.931  | 0.782  | 0.667  | 2.213  | 0.581  | 0.935  | 2.390   | 0.578   | 1.001   |
| 240.1955 | 2.124  | 1.448  | 1.377  | 1.694  | 0.929  | 0.249  | 3.002   | 1.609   | 3.477   |
| 242.2830 | 3.803  | 0.072  | 1.222  | 5.874  | 0.063  | 0.916  | 324.881 | 212.834 | 358.452 |
| 244.1908 | 4.354  | 3.305  | 3.033  | 3.190  | 2.367  | 7.705  | 6.866   | 5.341   | 24.076  |
| 244.1909 | 0.193  | 2.637  | 2.319  | 8.597  | 6.009  | 2.590  | 20.361  | 15.593  | 7.957   |
| 244.2268 | 6.883  | 22.296 | 4.917  | 91.322 | 25.048 | 71.450 | 46.134  | 68.169  | 168.396 |
| 244.2270 | 36.450 | 27.869 | 23.256 | 80.592 | 56.830 | 33.658 | 139.165 | 30.407  | 50.558  |
| 244.2271 | 18.463 | 13.233 | 12.061 | 32.359 | 47.246 | 63.846 | 25.941  | 107.265 | 147.217 |
| 245.1883 | 5.426  | 2.043  | 1.149  | 8.789  | 1.928  | 1.033  | 1.017   | 2.866   | 3.632   |

|          |        |        |        |         |        |         |         |         |         |
|----------|--------|--------|--------|---------|--------|---------|---------|---------|---------|
| 247.0756 | 8.402  | 4.652  | 3.781  | 11.253  | 3.819  | 4.663   | 12.009  | 2.210   | 5.456   |
| 254.2111 | 0.302  | 0.126  | 0.143  | 0.995   | 0.192  | 0.109   | 7.004   | 4.500   | 7.220   |
| 256.2269 | 11.987 | 46.881 | 45.641 | 139.518 | 88.195 | 29.752  | 448.349 | 325.985 | 509.560 |
| 256.2270 | 11.987 | 8.139  | 18.135 | 35.645  | 23.049 | 112.926 | 94.704  | 66.141  | 368.145 |
| 258.2068 | 1.844  | 26.814 | 25.124 | 23.323  | 13.409 | 6.712   | 4.309   | 17.925  | 28.931  |
| 259.2076 | 13.753 | 0.404  | 0.564  | 1.954   | 0.565  | 0.289   | 1.062   | 0.318   | 0.725   |
| 259.2454 | 8.178  | 4.194  | 2.939  | 62.951  | 23.810 | 31.293  | 77.747  | 41.737  | 89.402  |
| 259.6726 | 0.048  | 0.237  | 0.256  | 3.321   | 2.383  | 2.027   | 16.244  | 11.602  | 17.638  |
| 260.2224 | 11.367 | 7.710  | 6.315  | 7.869   | 4.004  | 5.017   | 2.935   | 1.786   | 3.288   |
| 260.2487 | 0.187  | 0.545  | 0.210  | 0.343   | 2.942  | 4.598   | 0.516   | 1.039   | 8.262   |
| 261.0914 | 5.016  | 1.535  | 1.396  | 7.632   | 1.571  | 1.922   | 3.053   | 1.668   | 1.526   |
| 270.2428 | 2.290  | 1.340  | 1.398  | 7.779   | 4.675  | 5.728   | 24.366  | 22.203  | 22.171  |
| 270.3152 | 19.125 | 12.958 | 9.396  | 16.507  | 7.689  | 13.256  | 17.929  | 12.297  | 16.884  |
| 272.2217 | 14.888 | 11.080 | 9.676  | 15.551  | 9.744  | 12.936  | 41.945  | 26.808  | 43.752  |
| 273.1904 | 1.936  | 0.710  | 1.231  | 0.821   | 0.295  | 1.851   | 4.477   | 0.824   | 0.625   |
| 273.2177 | 1.913  | 0.282  | 0.571  | 1.351   | 0.527  | 1.229   | 0.747   | 0.444   | 1.677   |
| 273.2252 | 2.726  | 2.281  | 2.474  | 3.305   | 3.723  | 3.714   | 9.201   | 4.462   | 9.844   |
| 273.2617 | 2.282  | 0.203  | 0.751  | 34.493  | 21.662 | 0.385   | 89.116  | 0.800   | 110.284 |
| 274.2370 | 4.639  | 1.112  | 0.221  | 31.875  | 17.750 | 22.624  | 15.687  | 8.082   | 15.298  |
| 281.1882 | 0.077  | 0.032  | 0.041  | 0.048   | 0.145  | 0.245   | 0.944   | 0.035   | 0.163   |
| 282.2791 | 5.876  | 3.852  | 3.562  | 4.019   | 2.236  | 2.815   | 0.036   | 0.067   | 0.123   |
| 286.2381 | 0.674  | 0.766  | 0.327  | 10.925  | 6.602  | 7.868   | 10.193  | 7.230   | 13.856  |
| 288.2179 | 6.298  | 4.589  | 3.592  | 0.206   | 1.347  | 1.996   | 0.591   | 3.651   | 4.030   |
| 288.2529 | 9.034  | 6.543  | 0.122  | 61.936  | 37.181 | 0.648   | 37.792  | 26.301  | 40.748  |
| 288.5204 | 0.613  | 0.413  | 0.301  | 3.639   | 3.029  | 3.205   | 3.934   | 3.220   | 4.900   |
| 289.2040 | 0.013  | 0.349  | 0.948  | 0.135   | 0.487  | 0.639   | 4.272   | 1.780   | 0.498   |
| 289.2561 | 1.327  | 0.929  | 0.973  | 13.767  | 7.072  | 9.935   | 6.955   | 4.540   | 6.417   |
| 293.1343 | 0.012  | 0.116  | 0.095  | 4.578   | 0.837  | 2.240   | 3.889   | 1.703   | 2.645   |
| 296.2948 | 0.192  | 1.050  | 0.651  | 2.899   | 0.415  | 1.753   | 0.318   | 0.052   | 0.102   |
| 299.1612 | 6.945  | 5.493  | 8.938  | 6.901   | 3.370  | 3.356   | 5.495   | 1.861   | 1.350   |
| 302.2324 | 1.471  | 0.258  | 0.277  | 1.261   | 0.276  | 0.139   | 2.265   | 0.110   | 0.724   |
| 302.2694 | 0.194  | 0.034  | 0.101  | 3.142   | 0.276  | 0.308   | 0.150   | 0.196   | 0.232   |
| 306.2129 | 1.764  | 0.283  | 0.025  | 2.736   | 1.295  | 1.679   | 2.961   | 0.473   | 1.360   |
| 310.1655 | 1.184  | 3.631  | 0.609  | 0.408   | 0.244  | 0.126   | 5.171   | 1.333   | 1.983   |
| 313.1913 | 0.054  | 0.011  | 0.010  | 0.206   | 0.308  | 0.514   | 6.620   | 0.260   | 5.197   |
| 322.2371 | 0.080  | 0.125  | 0.145  | 2.227   | 0.927  | 1.352   | 2.684   | 1.251   | 4.133   |
| 324.2076 | 0.000  | 0.031  | 0.104  | 0.000   | 0.010  | 0.171   | 0.013   | 0.019   | 2.055   |
| 325.1336 | 7.176  | 3.407  | 0.108  | 1.576   | 0.122  | 0.000   | 0.000   | 0.000   | 0.000   |
| 344.2389 | 0.124  | 0.112  | 0.111  | 0.152   | 2.004  | 0.313   | 6.004   | 6.370   | 3.525   |
| 349.2278 | 0.354  | 0.173  | 0.546  | 2.744   | 0.054  | 2.382   | 0.142   | 0.251   | 0.075   |
| 366.3362 | 0.000  | 0.000  | 0.000  | 0.623   | 0.220  | 0.152   | 4.202   | 0.190   | 0.694   |

|                       |         |         |         |          |          |          |          |          |          |
|-----------------------|---------|---------|---------|----------|----------|----------|----------|----------|----------|
| 367.3323              | 3.057   | 0.411   | 2.091   | 6.011    | 3.467    | 4.374    | 0.116    | 0.084    | 0.184    |
| 381.3479              | 0.131   | 0.387   | 0.356   | 6.180    | 1.239    | 0.187    | 0.070    | 0.116    | 0.184    |
| 432.2771              | 0.684   | 0.637   | 0.568   | 6.401    | 4.587    | 6.950    | 5.447    | 4.606    | 8.354    |
| 451.3899              | 0.067   | 0.101   | 0.040   | 0.000    | 0.149    | 0.110    | 10.884   | 4.438    | 6.723    |
| 373.2638,<br>187.1359 | 44.100  | 41.468  | 36.693  | 52.606   | 37.050   | 46.629   | 90.543   | 75.096   | 103.226  |
| 387.2795,<br>194.1415 | 942.501 | 872.394 | 815.170 | 1891.060 | 1524.384 | 1759.488 | 2670.708 | 2308.580 | 2858.175 |
| 399.2822,<br>200.1446 | 45.905  | 33.176  | 30.042  | 97.719   | 60.264   | 76.876   | 87.888   | 58.198   | 94.319   |
| 401.2587,<br>201.1284 | 5.141   | 5.290   | 3.694   | 26.461   | 17.515   | 25.144   | 33.295   | 24.223   | 40.417   |
| 403.2740,<br>202.1410 | 46.761  | 41.434  | 37.410  | 222.112  | 151.634  | 201.371  | 278.414  | 206.729  | 310.481  |
| 415.2749,<br>208.1415 | 8.236   | 7.163   | 5.850   | 41.007   | 25.798   | 37.216   | 15.961   | 11.667   | 18.680   |
| 417.2537,<br>209.1308 | 4.012   | 3.265   | 2.624   | 1.622    | 0.904    | 1.001    | 2.186    | 1.400    | 2.278    |
| 419.2693,<br>210.1383 | 0.441   | 0.362   | 0.322   | 3.804    | 3.460    | 5.039    | 5.237    | 4.932    | 8.298    |
| 130.1595              | 90.164  | 69.670  | 54.757  | 89.153   | 55.952   | 81.086   | 91.112   | 63.845   | 102.822  |
| 200.2363              | 110.668 | 82.611  | 73.881  | 122.000  | 75.040   | 107.166  | 113.176  | 79.865   | 135.593  |
| 228.1967              | 46.077  | 32.804  | 28.658  | 108.946  | 69.950   | 87.033   | 161.838  | 113.509  | 178.310  |
| 242.2115<br>isomer    | 55.703  | 39.533  | 32.039  | 107.643  | 65.919   | 79.901   | 213.728  | 149.076  | 250.758  |
| 242.2115<br>isomer    | 35.687  | 25.427  | 22.774  | 59.843   | 38.608   | 51.578   | 136.577  | 93.104   | 156.852  |
| 242.2115<br>isomer    | 196.865 | 155.823 | 133.270 | 317.947  | 206.694  | 258.134  | 748.534  | 546.598  | 843.107  |
| 258.2437              | 67.182  | 47.603  | 38.916  | 505.039  | 313.575  | 413.151  | 674.147  | 474.522  | 773.172  |
| 272.2574              | 43.757  | 30.395  | 28.012  | 234.213  | 143.189  | 195.592  | 625.380  | 412.413  | 681.683  |

**S10:** MS/MS spectra for: 1) m/z 387, 2) m/z 403, 3) m/z 419, 4) m/z 228, 5) m/z 242-1, 6) m/z 242-2, 7) m/z 242-3, 8) m/z 258, and 9) m/z 272

**S10-1) m/z 387**

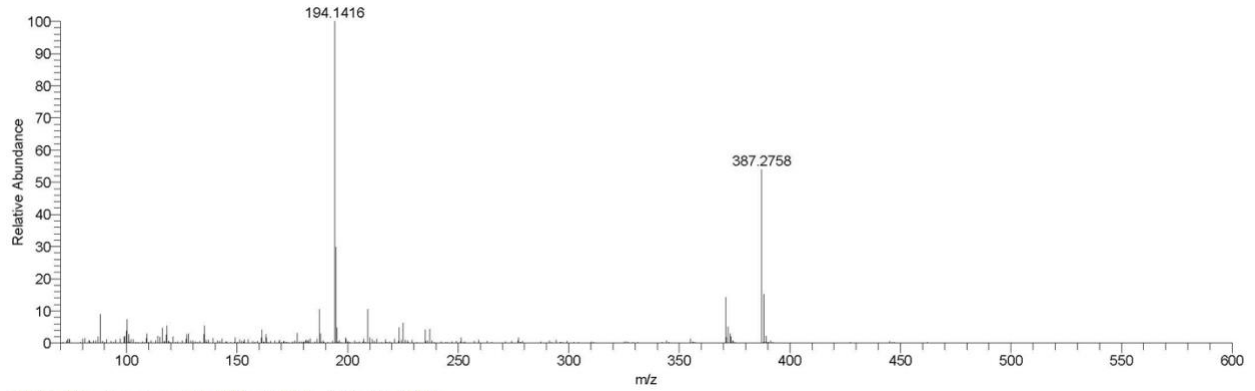

041919\_479multiplexprmandda#900 RT: 2.01 AV: 1 NL: 5.11E8  
=: FTMS + p ESI Full ms2 387.2795@hcd35.00 [50.0000-415.0000]

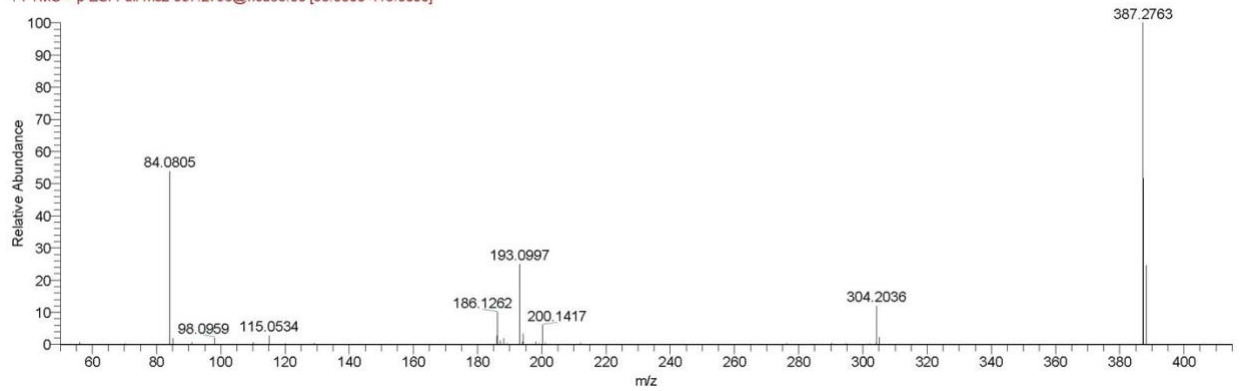

# S10-2) m/z 403

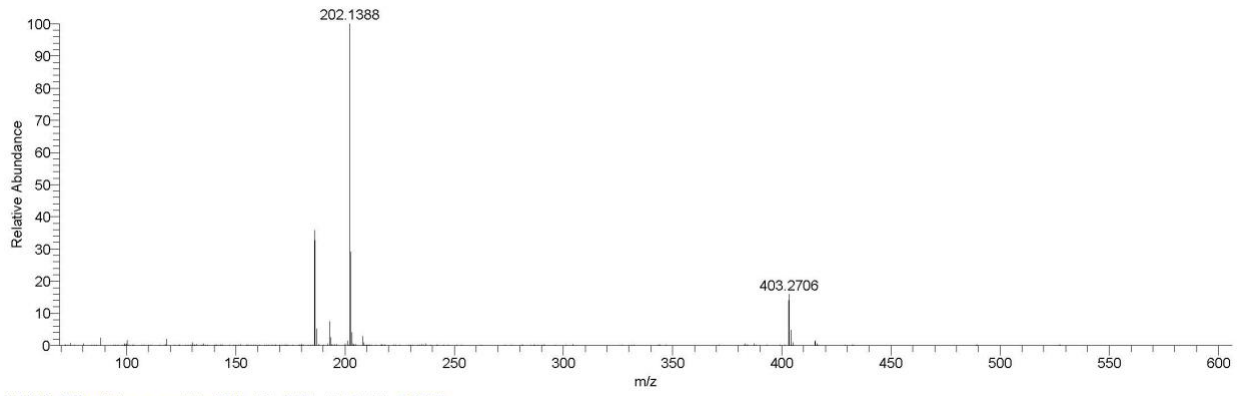

041919\_479multiplexprmandda#919 RT: 2.05 AV: 1 NL: 6.85E6  
F: FTMS + p ESI Full ms2 403.2740@hcd35.00 [50.0000-430.0000]

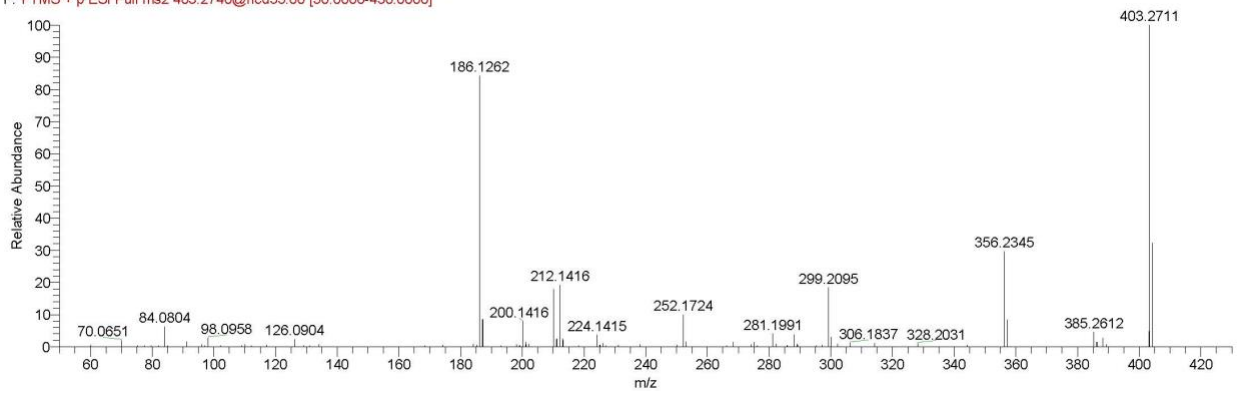

### S10-3) m/z 419

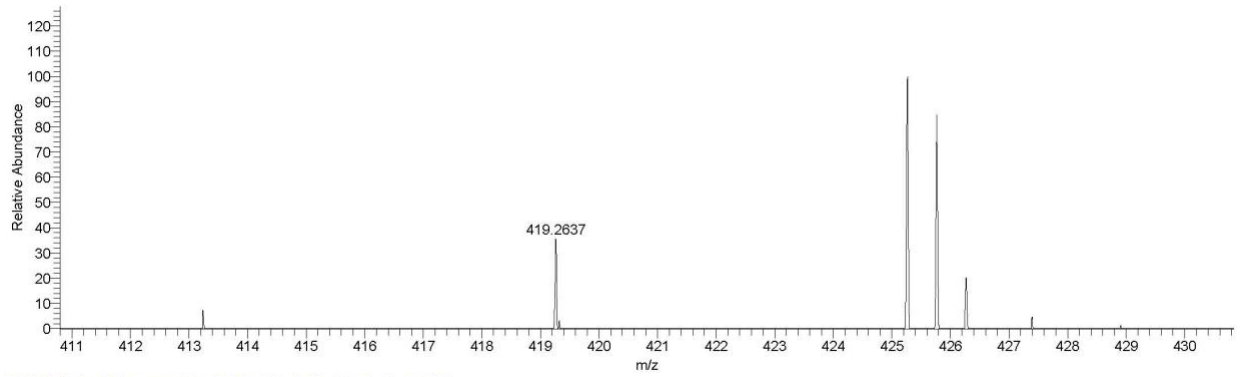

041919\_479multiplexprmandda2#972 RT: 2.15 AV: 1 NL: 1.80E5  
F: FTMS + p ESI Full ms2 419.2693@hed35.00 [50.0000-445.0000]

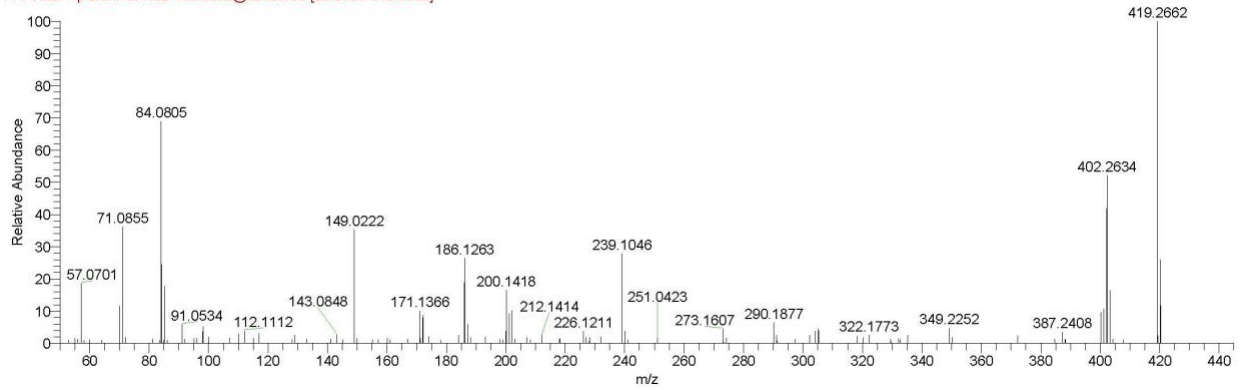



# S10-4) m/z 228

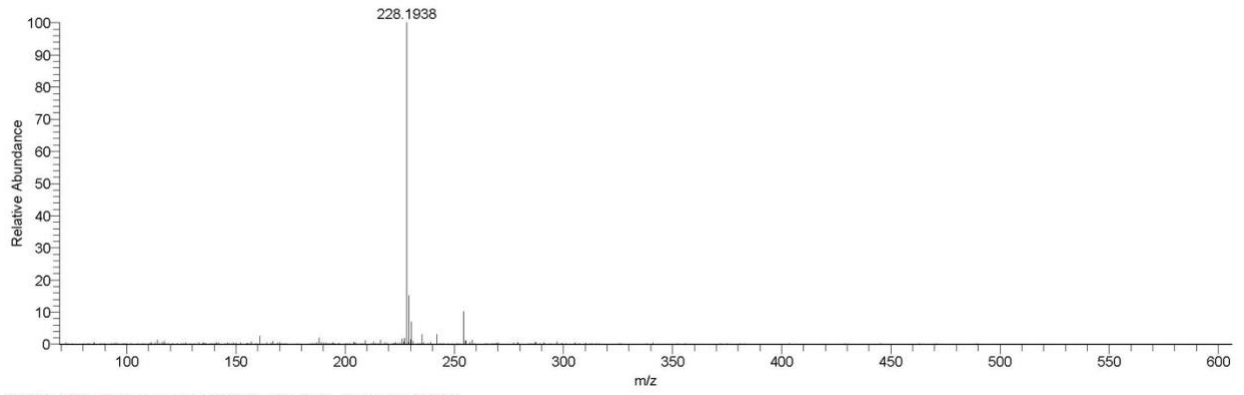

041919\_479multiplexprmandda2#1170 RT: 2.52 AV: 1 NL: 5.19E7  
F: FTMS + p ESI Full ms2 228.1938@hcd40.00 [50.0000-250.0000]

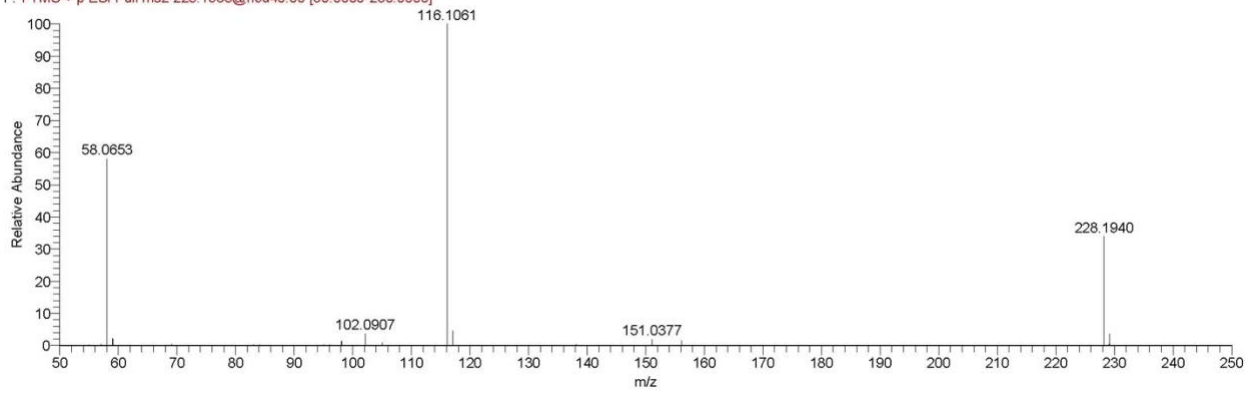

# S10-5) m/z 242

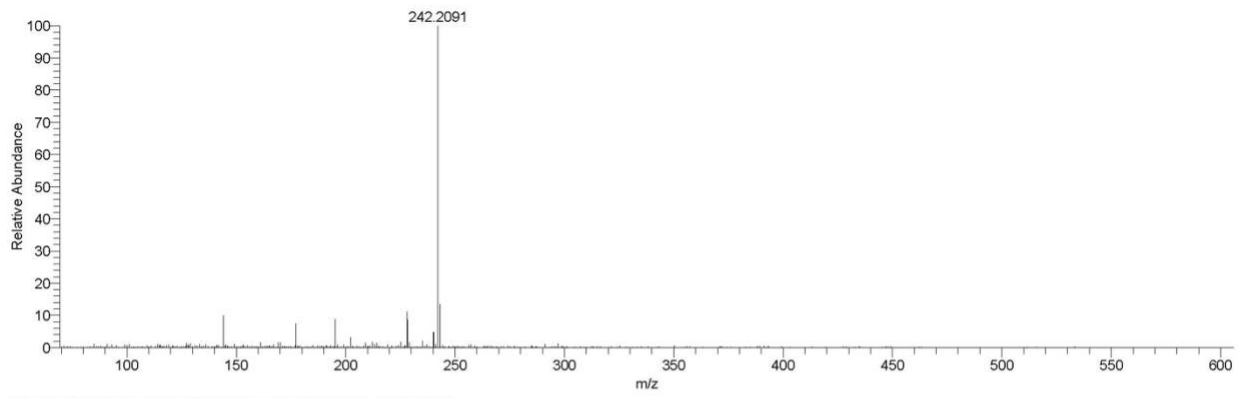

J41919\_479multiplexprmanddda #1134 RT: 2.48 AV: 1 NL: 1.57E8  
=: FTMS + p ESI Full ms2 242.2091@hcd35.00 [50.0000-265.0000]

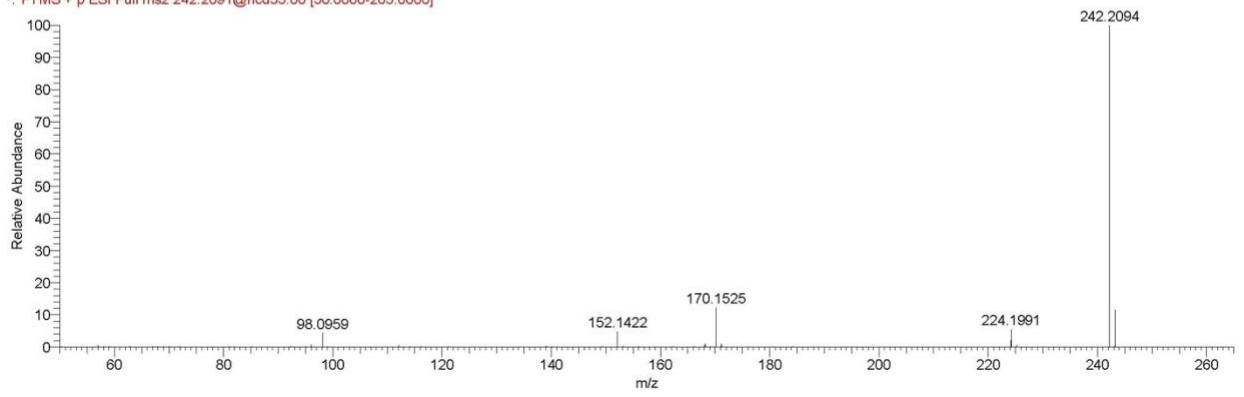

# S10-6) m/z 242

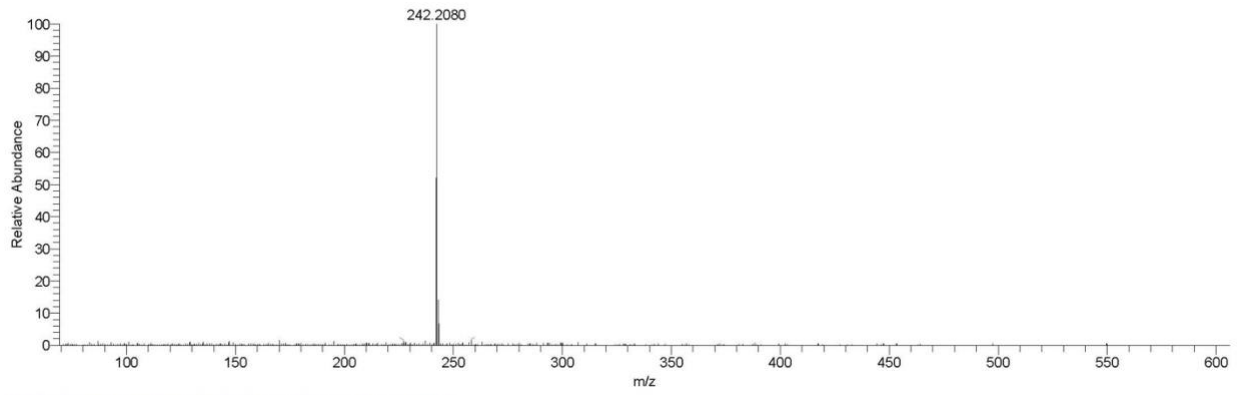

041919\_479multiplexprmandda#1166 RT: 2.52 AV: 1 NL: 5.31E7  
F: FTMS + p ESI Full ms2 242.2091@hcd35.00 [50.0000-265.0000]

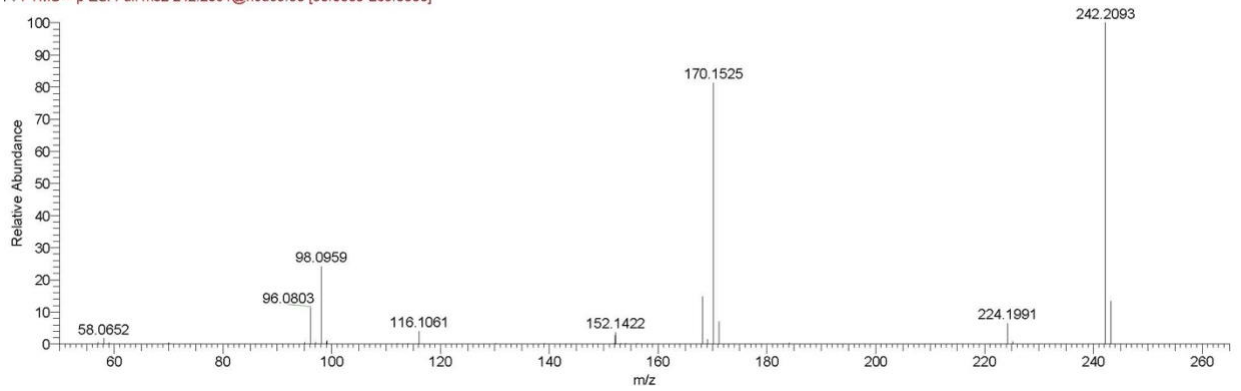

# S10-7) m/z 242

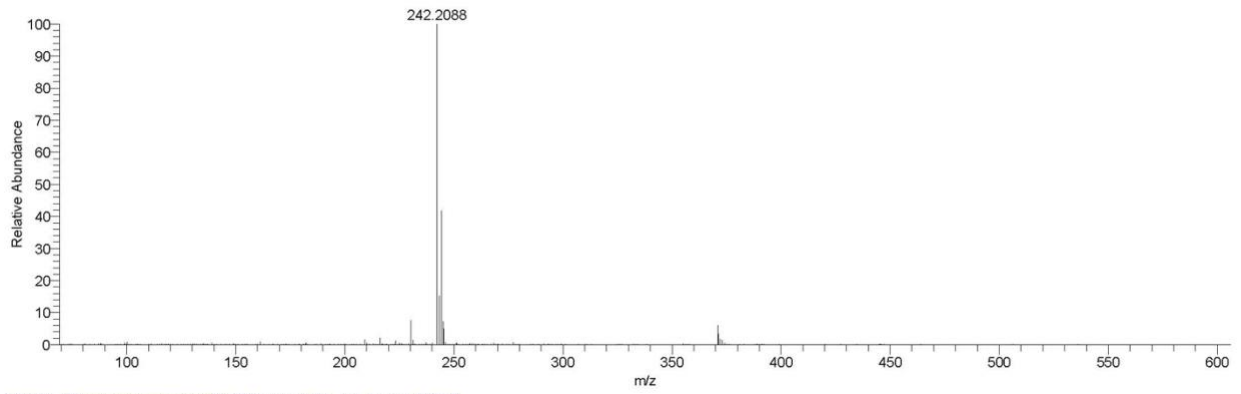

041919\_479multiplexprmandda2#1207 RT: 2.57 AV: 1 NL: 1.25E8  
F: FTMS + p ESI Full ms2 242.2091@hcd40.00 [50.0000-265.0000]

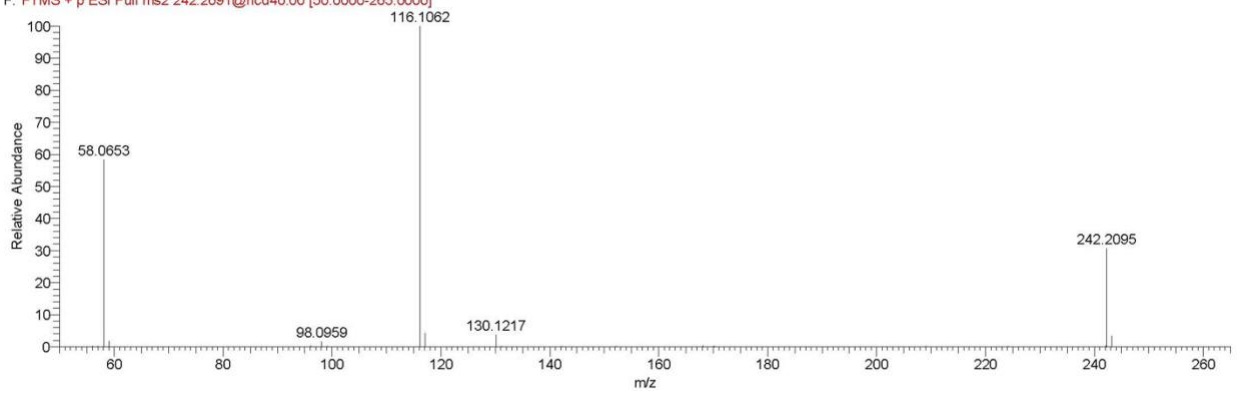

# S10-8) m/z 258

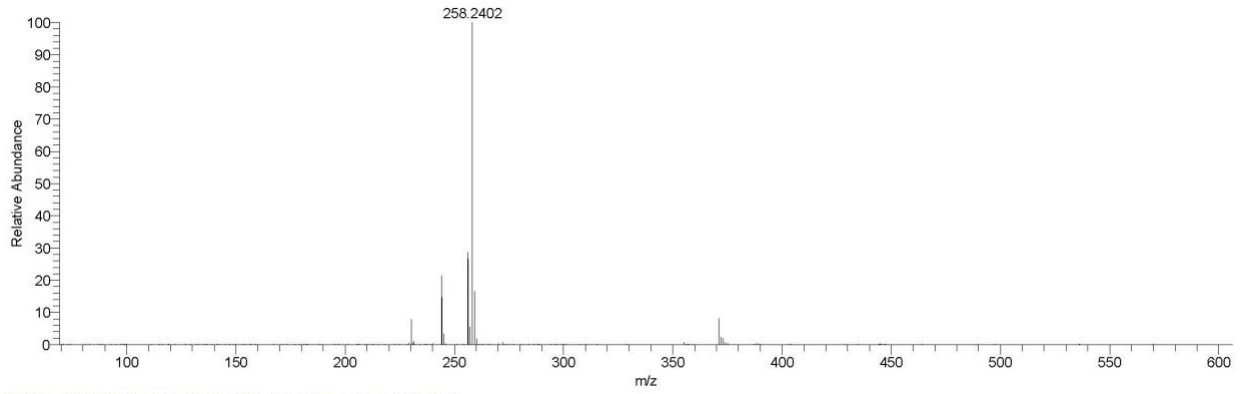

041919\_479multiplexprmanddda3#1215 RT: 2.63 AV: 1 NL: 7.92E6  
F: FTMS + p ESI Full ms2 258.2404@hcd40.00 [50.0000-280.0000]

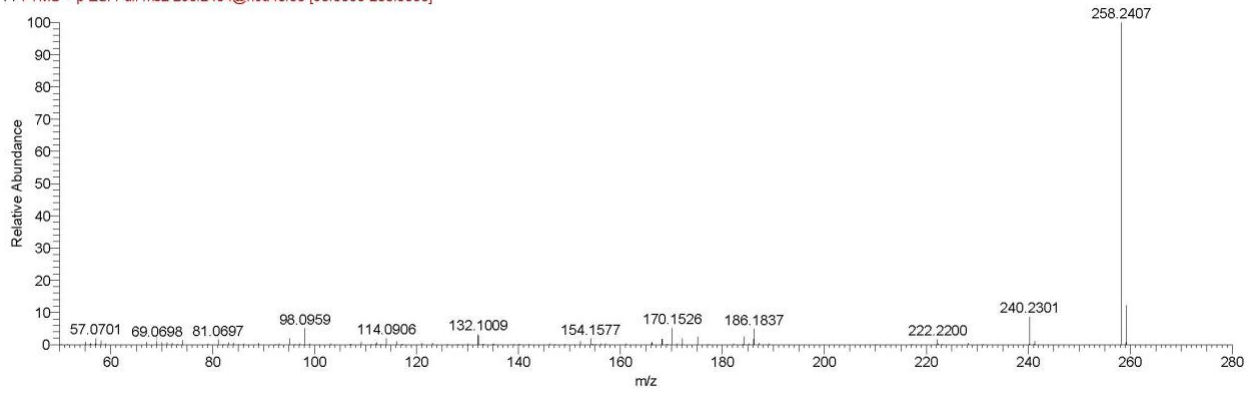

# S10-9) m/z 272

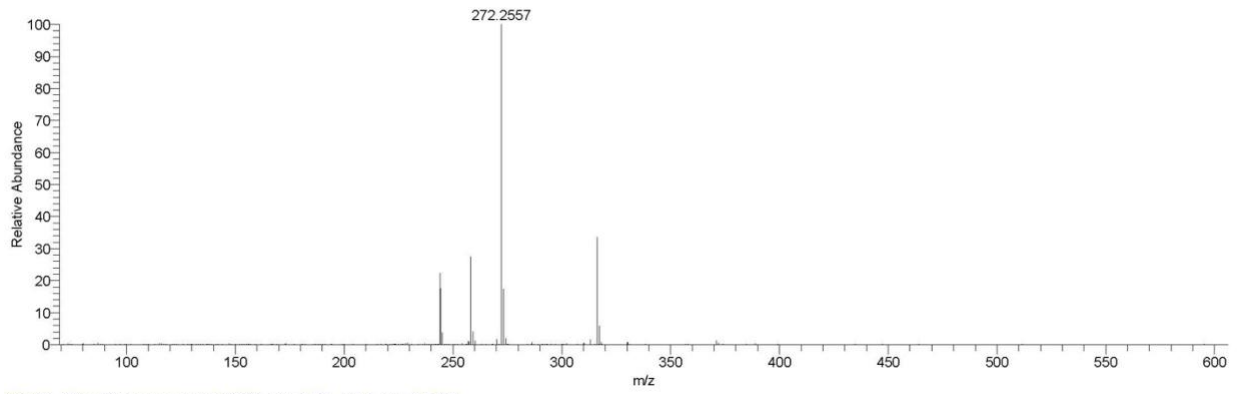

041919\_479multiplexprmanddda2#1295 RT: 2.72 AV: 1 NL: 2.50E7  
F: FTMS + p ESI Full ms2 272.2558@hcd40.00 [50.0000-295.0000]

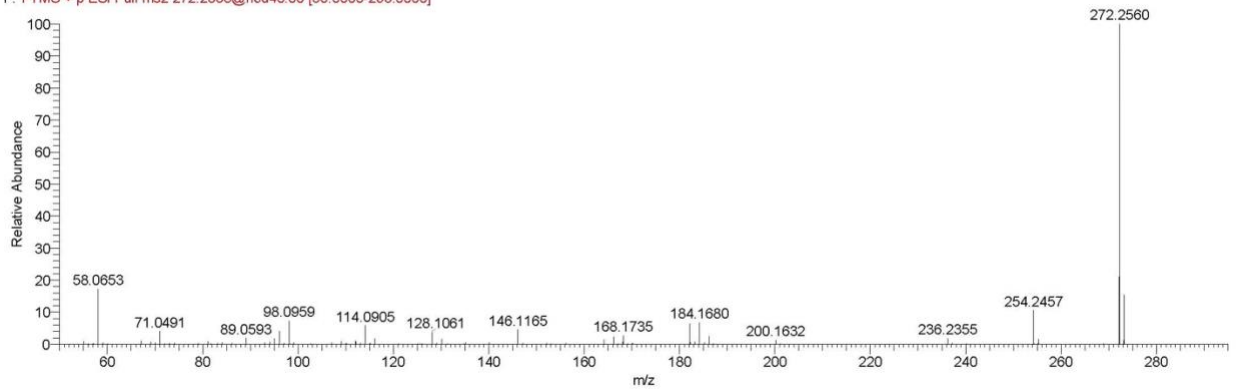

Supplement: NIHMS1673450-supplement-1.pdf [file NIHMS1673450-supplement-1.pdf]
